# Supplementary material for: Pure and intense orange upconversion luminescence of Eu3+from the sensitization of Yb3+–Mn2+dimer in NaY(Lu)F4nanocrystals
Source: Royal Society of Chemistry journal article supplement (doi:10.1039/c4tc01778a), 2014-01-01
Supplement: c4tc01778a1.pdf [file c4tc01778a1.pdf]

## Supporting Information

# Pure and Intense Orange Upconversion Luminescence of $\text{Eu}^{3+}$ from the Sensitization of $\text{Yb}^{3+}$ - $\text{Mn}^{2+}$ Dimer in $\text{NaY}(\text{Lu})\text{F}_4$ Nanocrystals

Zhuo Wang,<sup>ab</sup> Jing Feng,<sup>\*a</sup> Shuyan Song,<sup>a</sup> Zhiqiang Sun,<sup>c</sup> Shuang Yao,<sup>a</sup> Xin Ge,<sup>a</sup>  
Min Pang<sup>ab</sup> and Hongjie Zhang<sup>\*a</sup>

<sup>a</sup> State Key Laboratory of Rare Earth Resource Utilization, Changchun Institute of Applied Chemistry, Chinese Academy of Sciences, 5625 Renmin Street, Changchun 130022, China

<sup>b</sup> University of Chinese Academy of Sciences, Beijing 100049, China

<sup>c</sup> Cancer Hospital of Jilin Province, Changchun 130021, China

\* Corresponding Authors

Email: fengj@ciac.ac.cn (Jing Feng), hongjie@ciac.ac.cn (Hongjie Zhang)

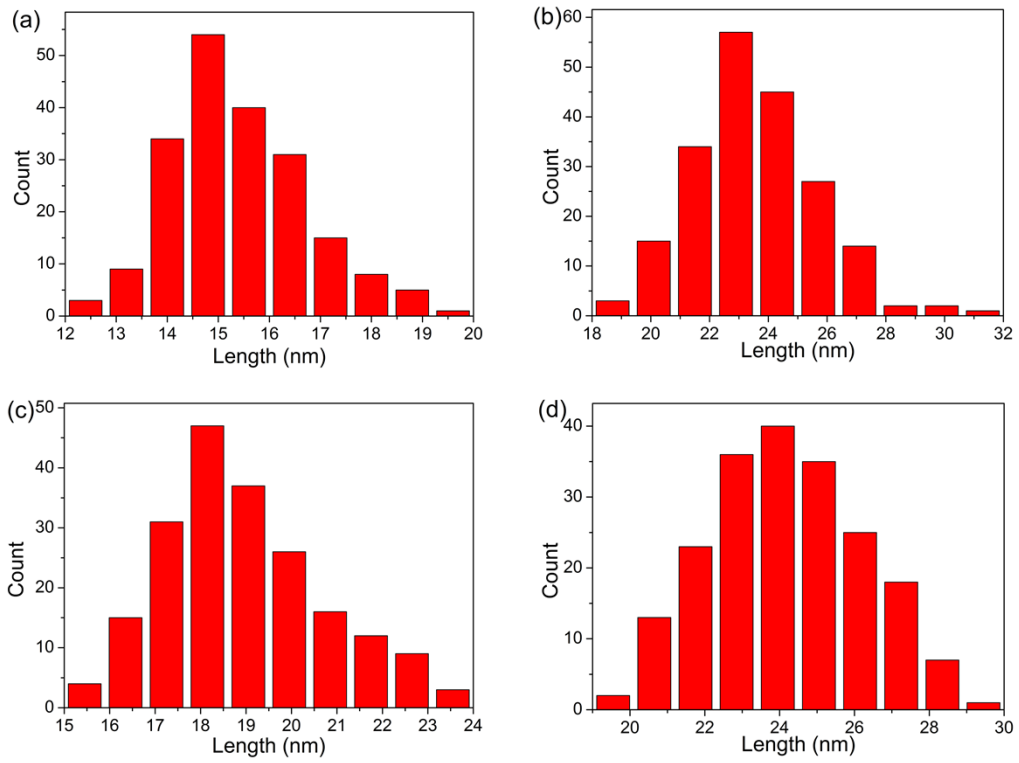

**Fig. S1** Size histograms of (a) NaYF<sub>4</sub>:Yb<sup>3+</sup>/Mn<sup>2+</sup>/Eu<sup>3+</sup> (5/30/15 mol%) core and (b) core-shell NCs and (c) NaLuF<sub>4</sub>:Yb<sup>3+</sup>/Mn<sup>2+</sup>/Eu<sup>3+</sup> (5/30/15 mol%) core and (d) core-shell NCs.

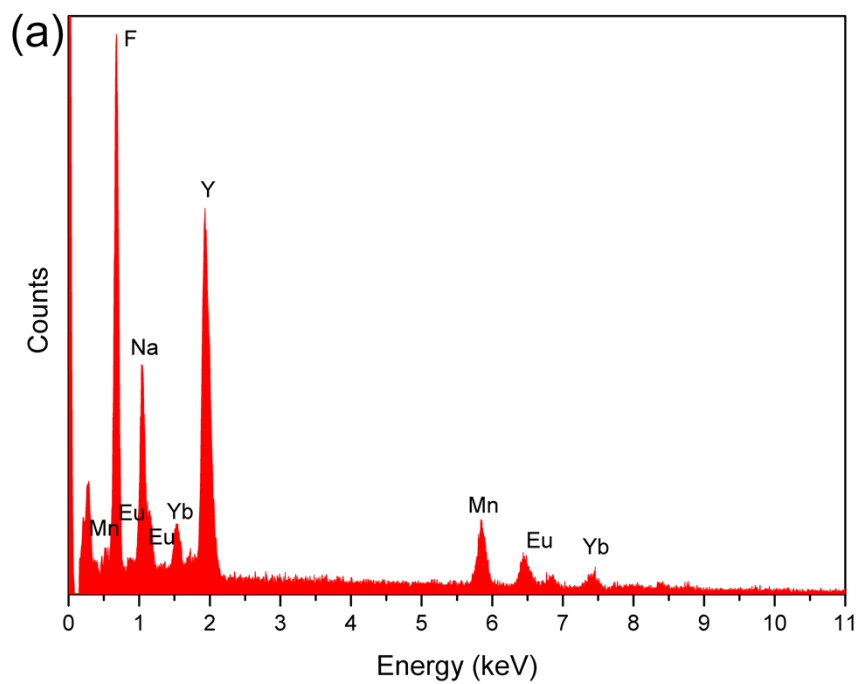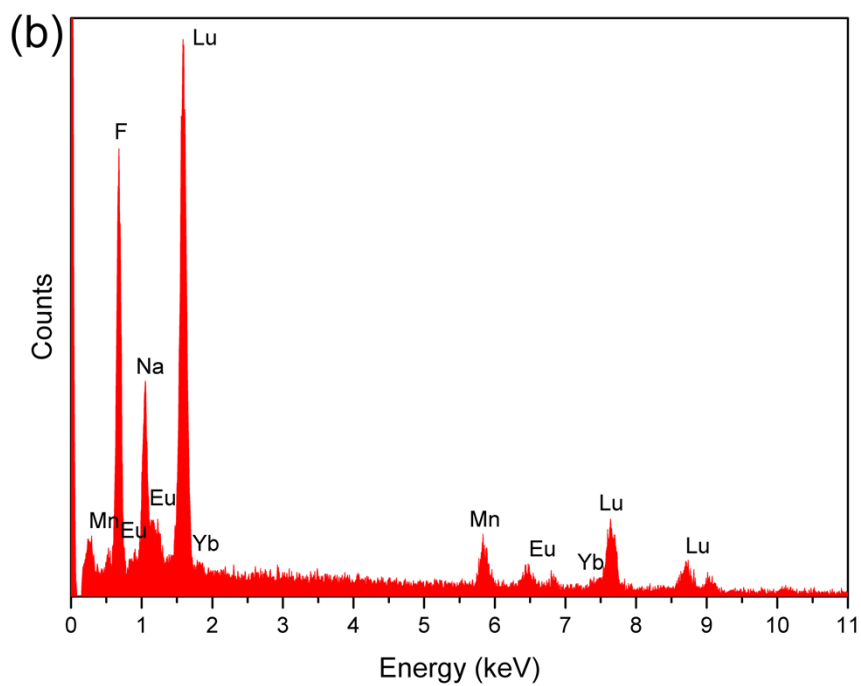

**Fig. S2** EDX spectroscopy of (a) NaYF<sub>4</sub>:Yb<sup>3+</sup>/Mn<sup>2+</sup>/Eu<sup>3+</sup> (5/30/15 mol%) NCs and (b) NaLuF<sub>4</sub>:Yb<sup>3+</sup>/Mn<sup>2+</sup>/Eu<sup>3+</sup> (5/30/15 mol%) NCs.

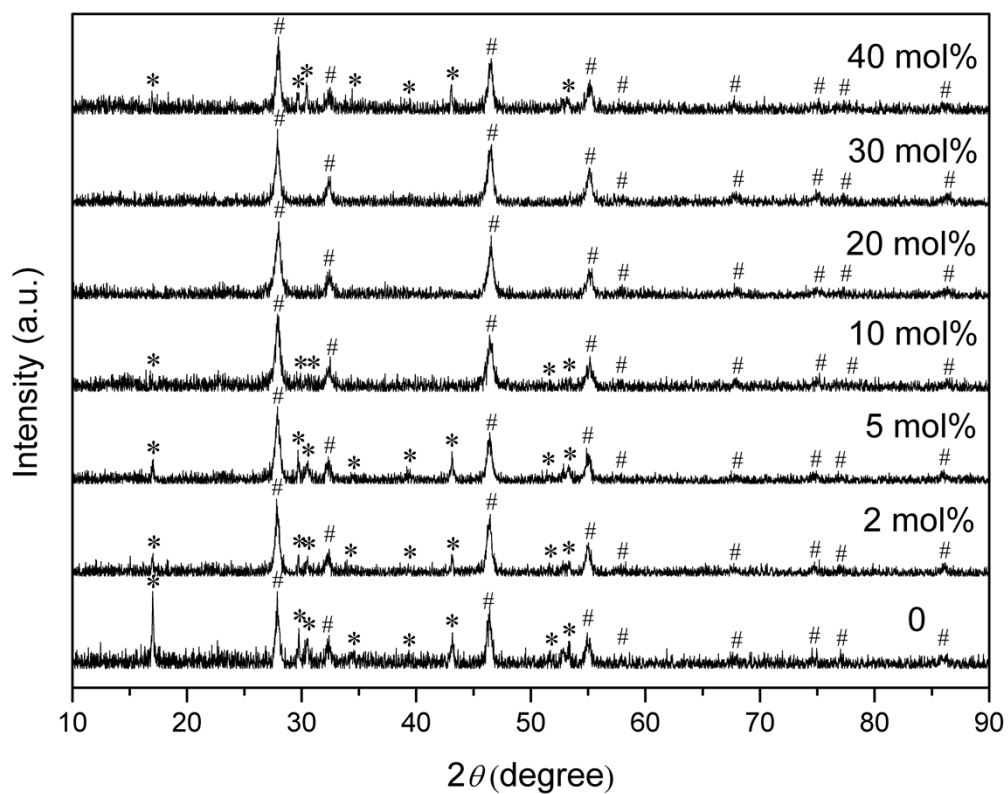

**Fig. S3** XRD patterns of NaYF<sub>4</sub>:Yb<sup>3+</sup>/Mn<sup>2+</sup>/Eu<sup>3+</sup> (5/y/15 mol%) (y = 0-40) NCs.

Symbols # and \* represent the standard diffraction peaks of α-NaYF<sub>4</sub> and β-NaYF<sub>4</sub>.

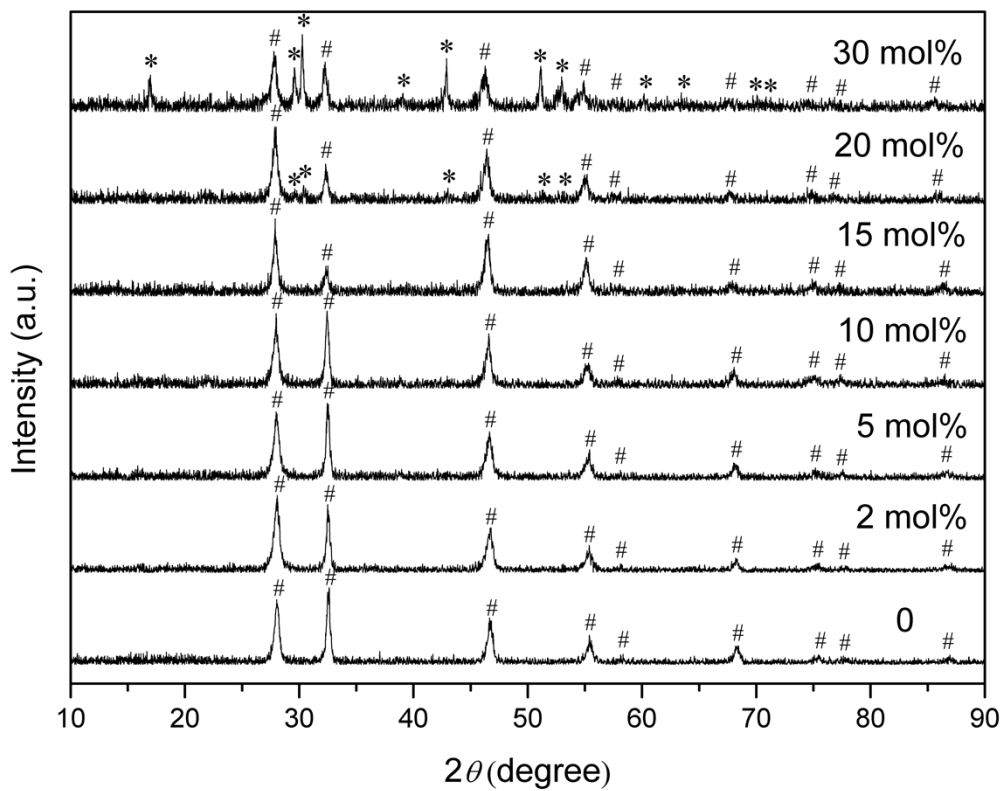

**Fig. S4** XRD patterns of NaYF<sub>4</sub>:Yb<sup>3+</sup>/Mn<sup>2+</sup>/Eu<sup>3+</sup> (5/30/z mol%) (z = 0-30) NCs.

Symbols # and \* represent the standard diffraction peaks of α-NaYF<sub>4</sub> and β-NaYF<sub>4</sub>.

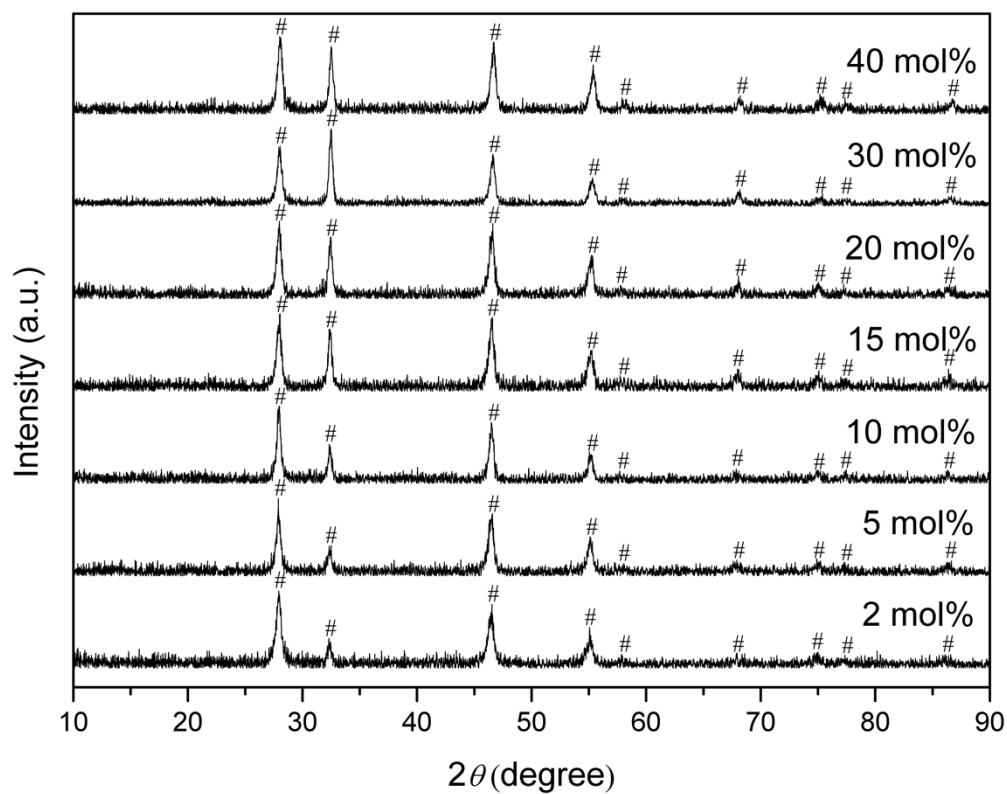

**Fig. S5** XRD patterns of NaYF<sub>4</sub>:Yb<sup>3+</sup>/Mn<sup>2+</sup>/Eu<sup>3+</sup> (x/30/15 mol%) (x = 2-40) NCs.

Symbol # represents the standard diffraction peaks of α-NaYF<sub>4</sub>.

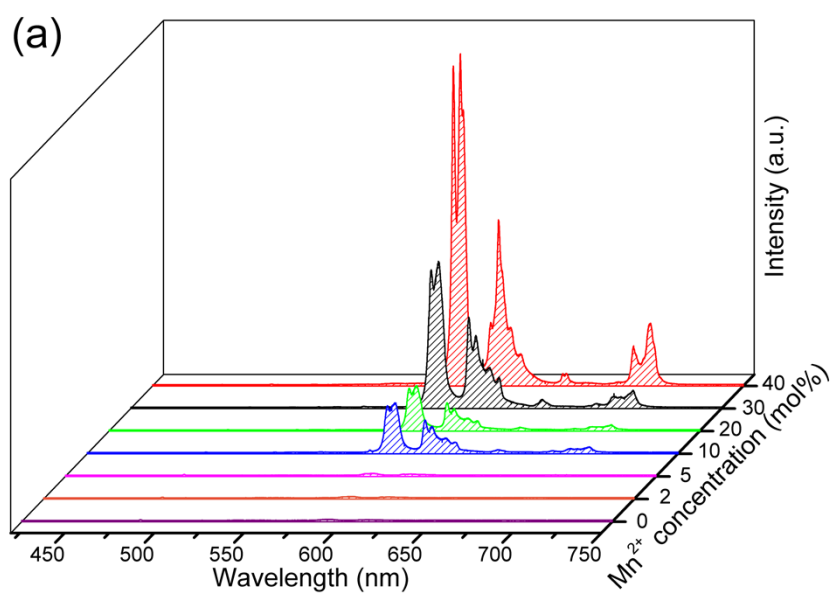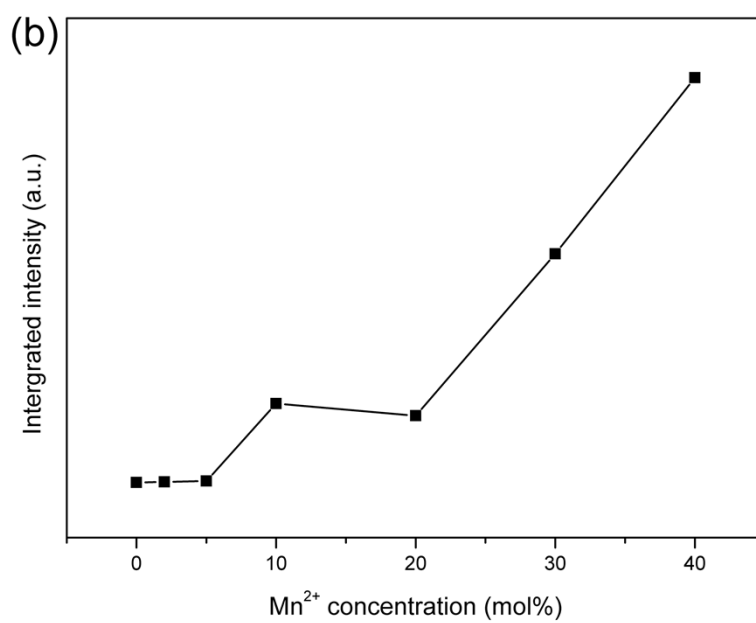

**Fig. S6** (a) UCL emission spectra of NaYF<sub>4</sub>:Yb<sup>3+</sup>/Mn<sup>2+</sup>/Eu<sup>3+</sup> (5/y/15 mol%) (y = 0-40) NCs and (b) corresponding integrated intensity.

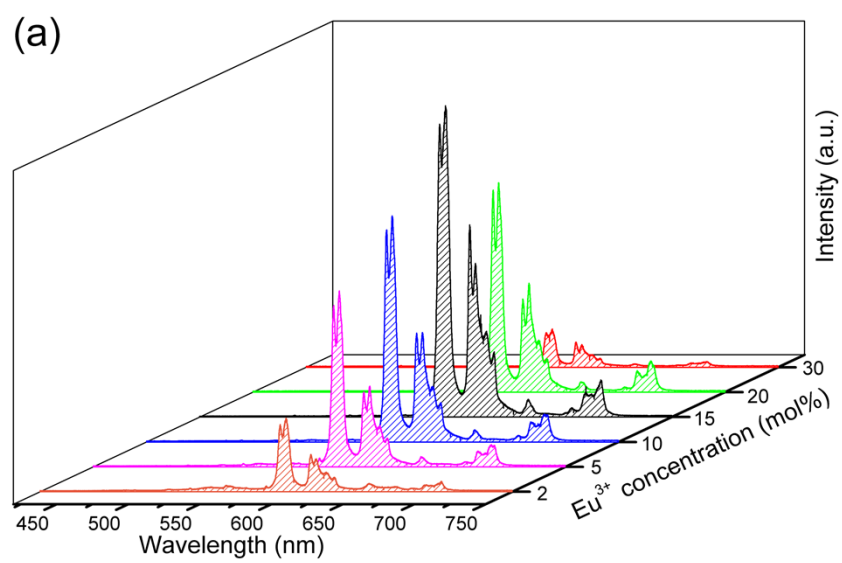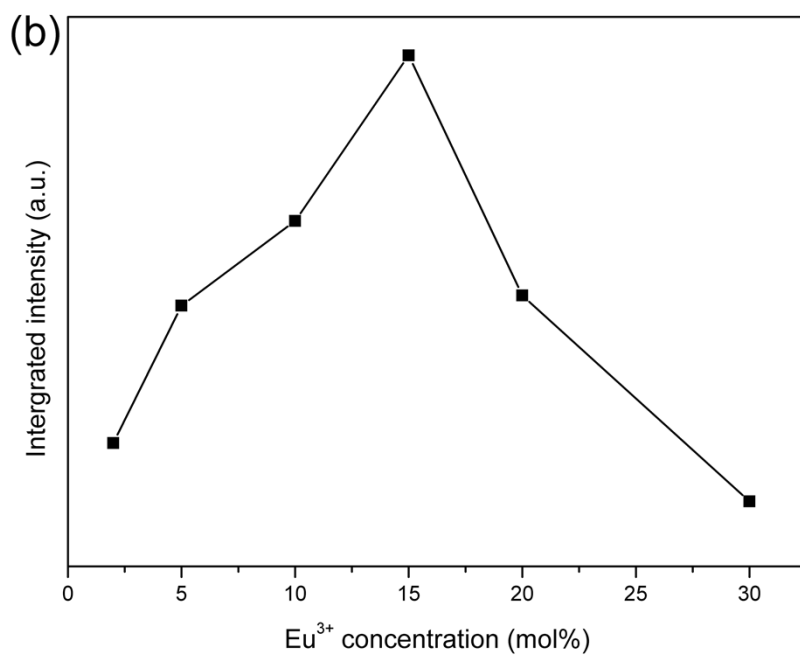

**Fig. S7** (a) UCL emission spectra of NaYF<sub>4</sub>:Yb<sup>3+</sup>/Mn<sup>2+</sup>/Eu<sup>3+</sup> (5/30/z mol%) (z = 2-30) NCs and (b) corresponding integrated intensity.



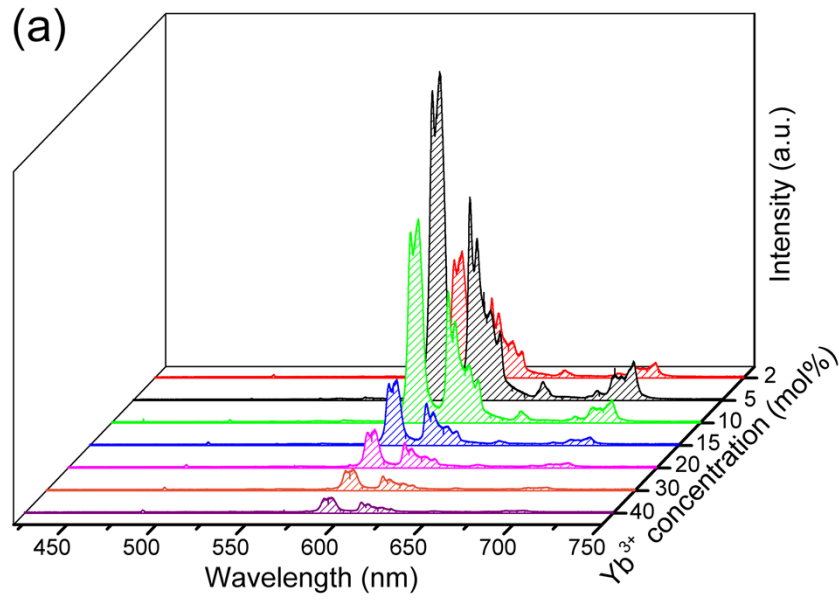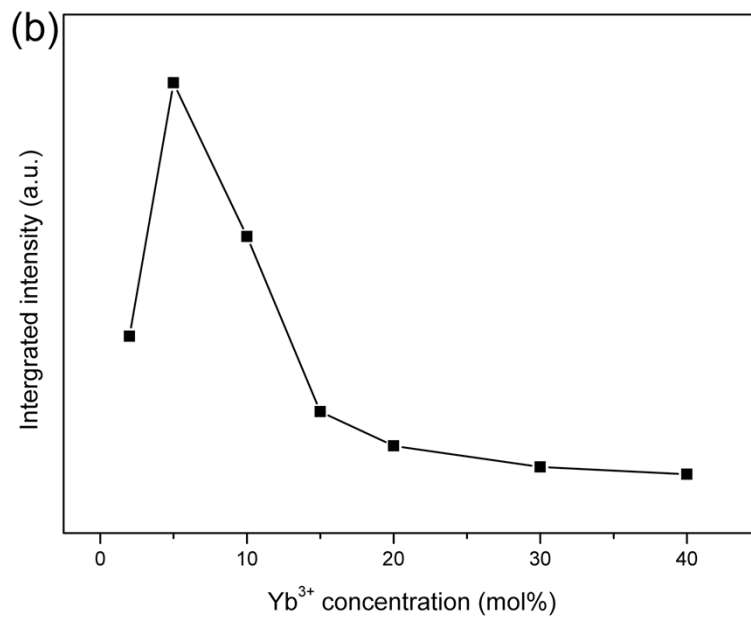

**Fig. S8** (a) UCL emission spectra of NaYF<sub>4</sub>:Yb<sup>3+</sup>/Mn<sup>2+</sup>/Eu<sup>3+</sup> (x/30/15 mol%) (x = 2-40) NCs and (b) corresponding integrated intensity.

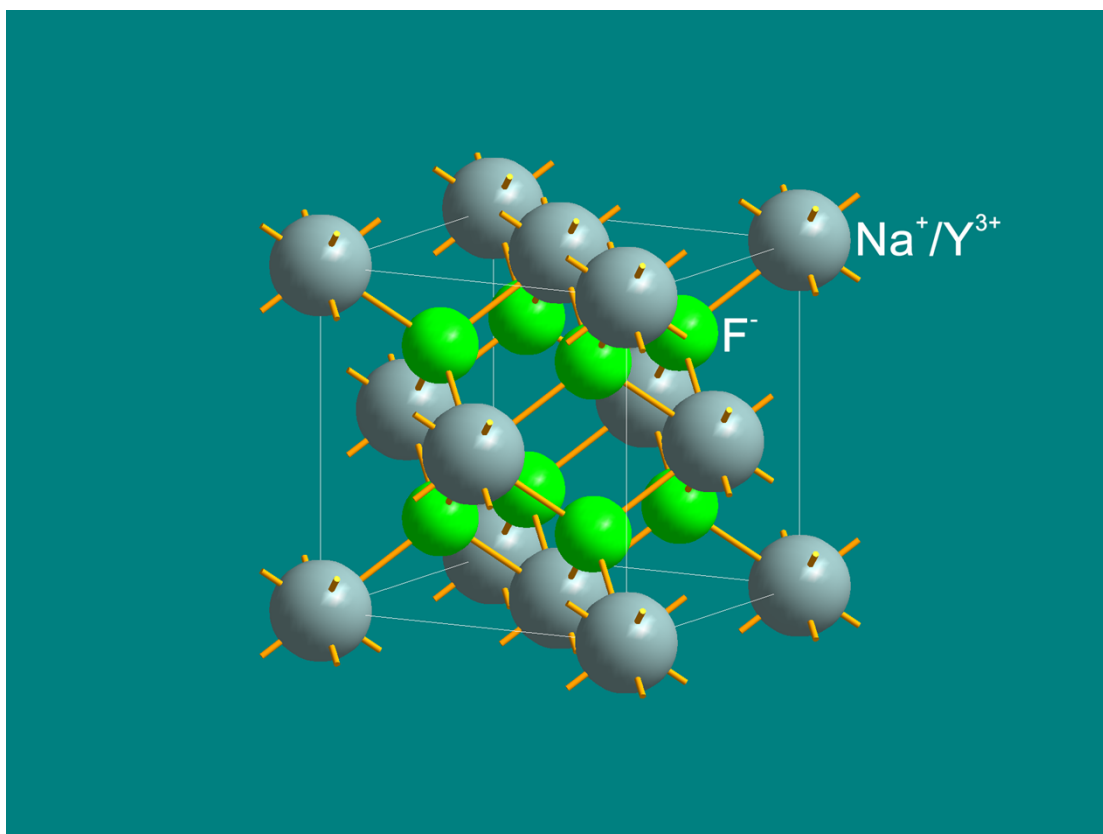

**Fig. S9** Crystallographic structure of  $\alpha$ - $\text{NaYF}_4$  according to ICSD 60257,  $\text{Na}^+$  and  $\text{Y}^{3+}$  cations are randomly distributed in the cationic sublattice.

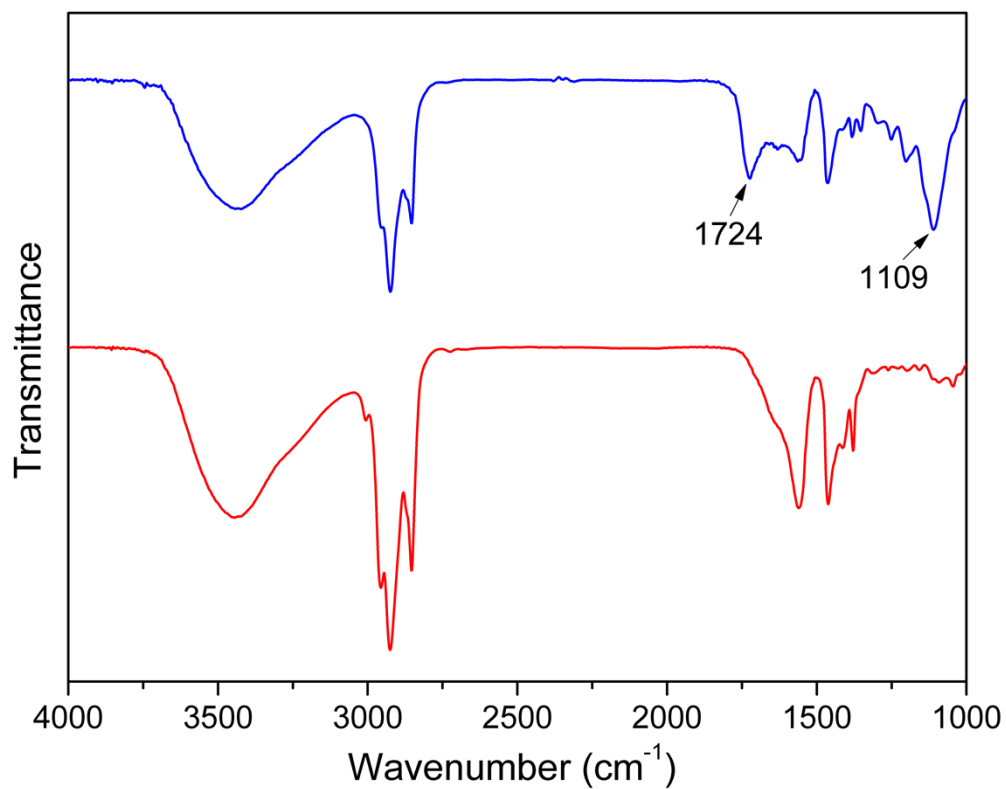

**Fig. S10** FT-IR spectra of OA-UCNCs (red curve) and PEG-UCNCs (blue curve).

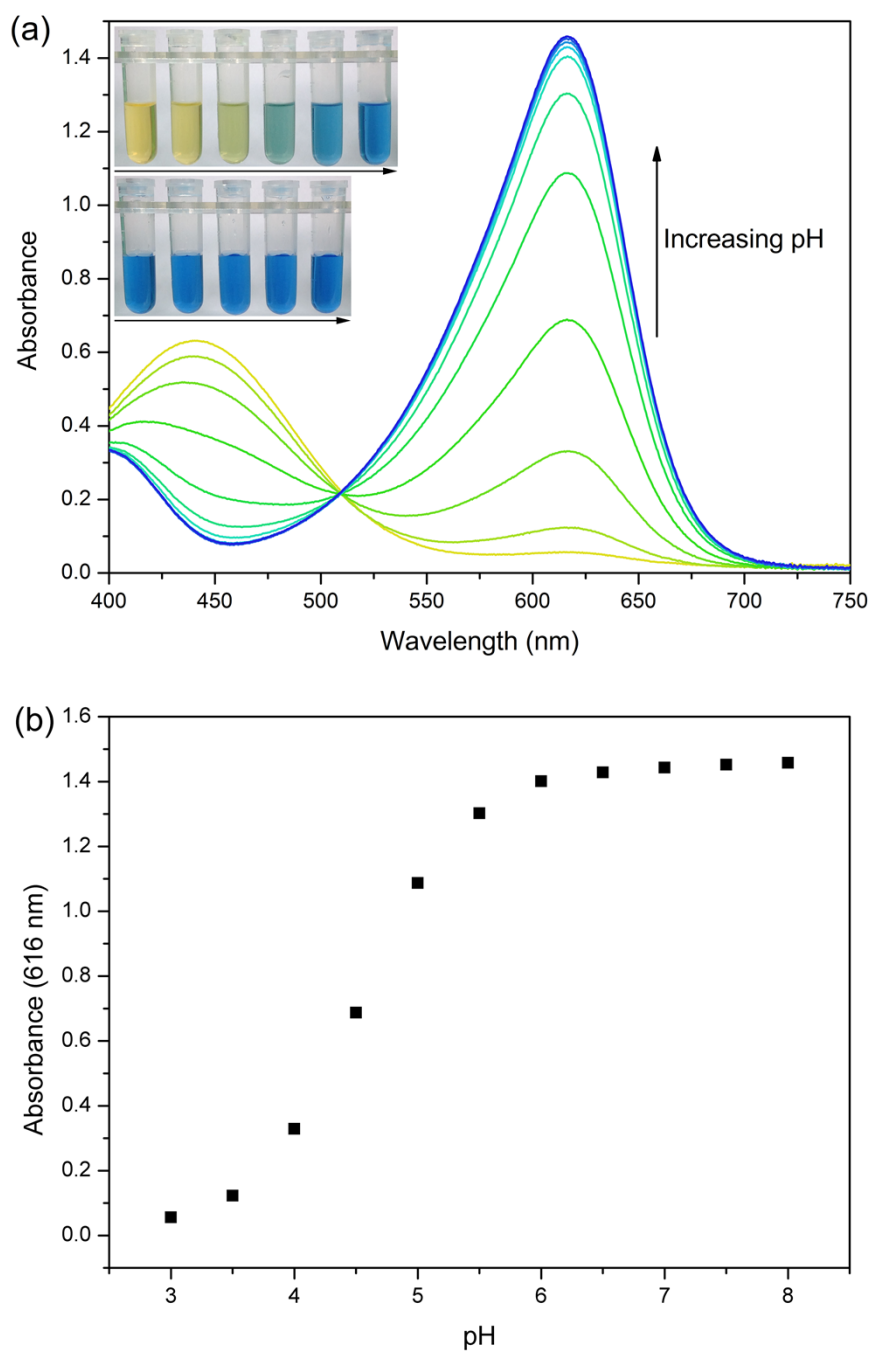

**Fig. S11** (a) Absorption spectra and corresponding photographs of BCG in buffer solutions of different pH values and (b) absorbance at 616 nm with increasing pH values.

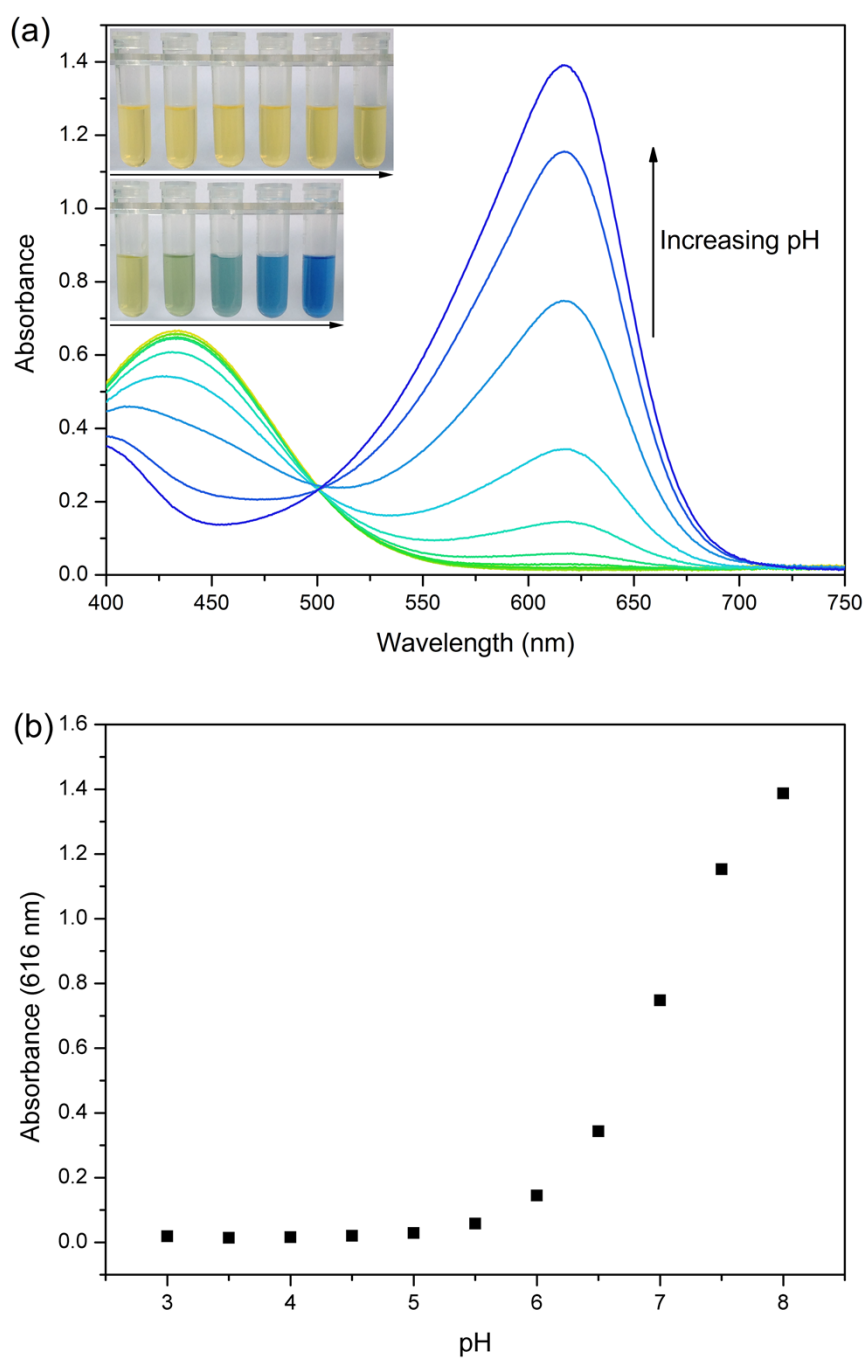

**Fig. S12** (a) Absorption spectra and corresponding photographs of BTB in buffer solutions of different pH values and (b) absorption at 616 nm with increasing pH values.

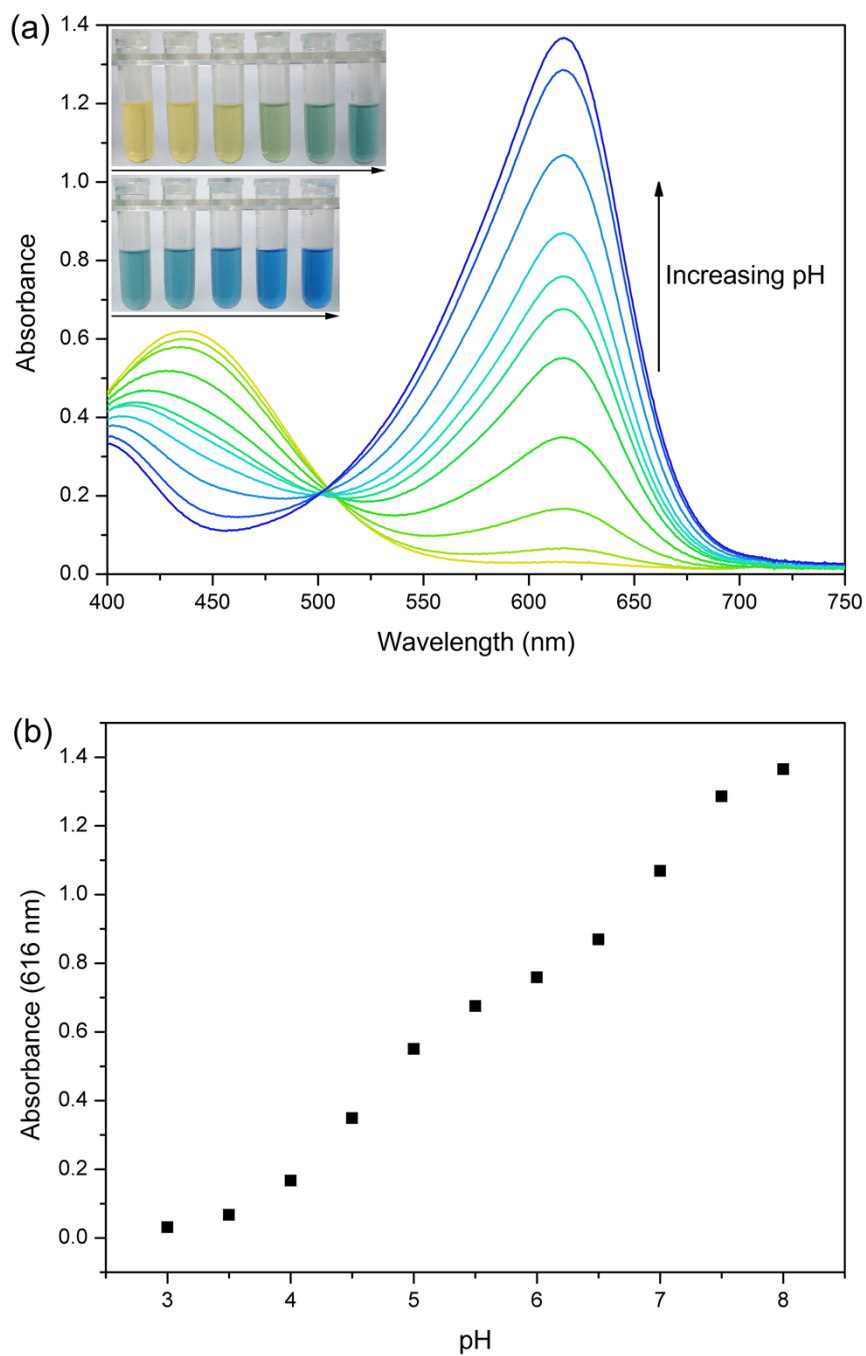

**Fig. S13** (a) Absorption spectra and corresponding photographs of BCG and BTB mixture (mass ratio = 1:1) in buffer solutions of different pH values and (b) absorbance at 616 nm with increasing pH values.

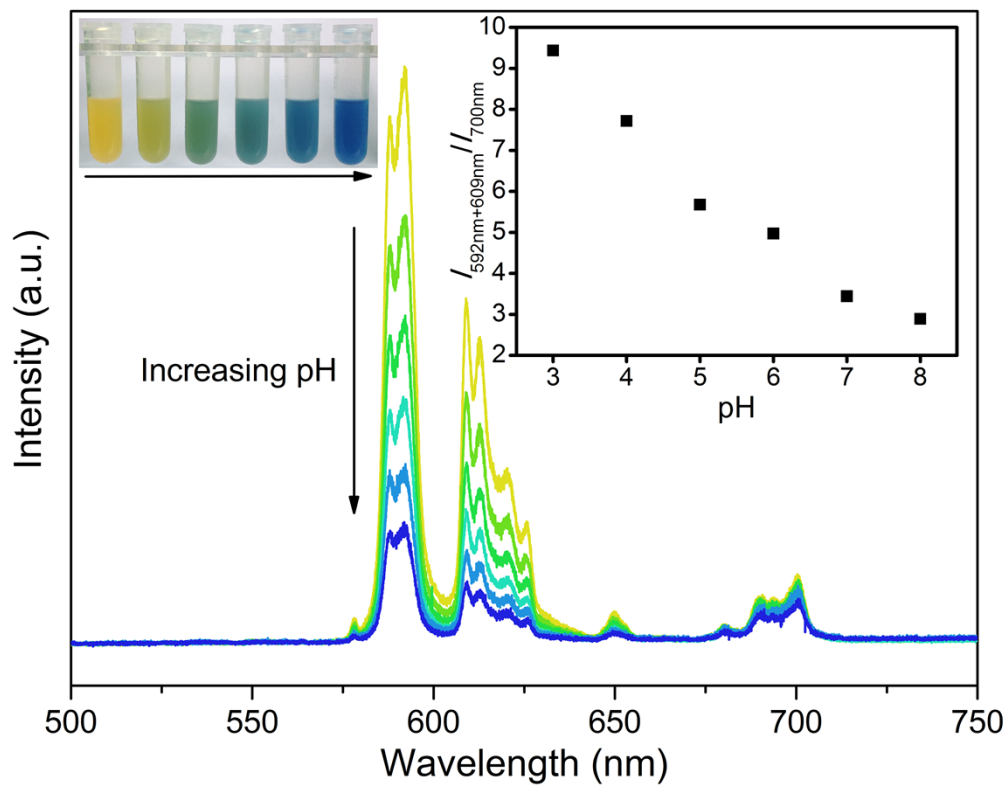

**Fig. S14** UCL spectra and corresponding photographs of PEG-UCNCs with BCG and BTB mixture in buffer solutions of different pH values and the ratio of integrated intensity of  ${}^5D_0 \rightarrow {}^7F_1$  (592 nm) plus  ${}^5D_0 \rightarrow {}^7F_2$  (609 nm) to  ${}^5D_0 \rightarrow {}^7F_4$  (700 nm) at different pH values (inset).

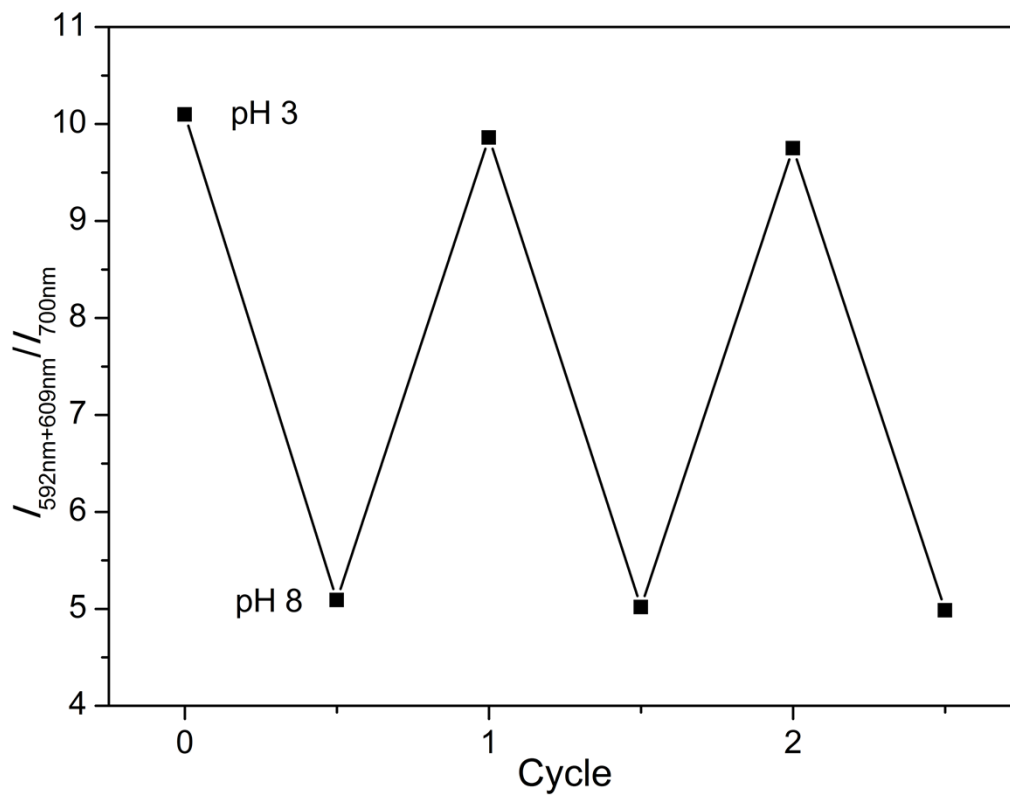

**Fig. S15** The ratio of integrated intensity of  ${}^5\text{D}_0 \rightarrow {}^7\text{F}_1$  (592 nm) plus  ${}^5\text{D}_0 \rightarrow {}^7\text{F}_2$  (609 nm) to  ${}^5\text{D}_0 \rightarrow {}^7\text{F}_4$  (700 nm) of the sensor film in buffer solutions of pH 3 and pH 8 for several cycles.
